# Supplementary material
Source: Elsevier journal article supplement (https://www.sciencedirect.com/science/article/pii/S030089321630416X)
Supplement: mmc1 [file S030089321630416X:mmc1.pdf]

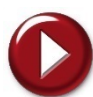**Supplementary material**

## The Ratio Between Visceral and Subcutaneous Abdominal Fat Assessed by Computed Tomography Is an Independent Predictor of Mortality and Cardiac Events

**Table of the supplementary material**

Comparison of Characteristics Between Patients According to Available 3-year Follow-up Data

| Variable                                    | Available data for<br>3-year follow-up<br>n = 107 | No 3-year follow-<br>up data<br>n = 606 | P    |
|---------------------------------------------|---------------------------------------------------|-----------------------------------------|------|
| Age, y, mean $\pm$ standard deviation       | 57.6 $\pm$ 10.2                                   | 58.5 $\pm$ 10.4                         | .424 |
| Male sex, n (%)                             | 59 (55.1)                                         | 378 (62.4)                              | .157 |
| Hypertension, n (%)                         | 58 (54.2)                                         | 348 (57.4)                              | .535 |
| DM2, n (%)                                  | 14 (13.1)                                         | 81 (13.4)                               | .937 |
| Hyperlipidemia, n (%)                       | 50 (46.7)                                         | 286 (47.2)                              | .929 |
| Current smoking, n (%)                      | 15 (14.0)                                         | 98 (16.2)                               | .674 |
| Obesity (BMI $\geq$ 30 kg/m <sup>2</sup> )  | 44 (41.1)                                         | 206 (34.0)                              | .154 |
| Total abdominal fat area (cm <sup>2</sup> ) | 365.9 $\pm$ 143.0                                 | 365.3 $\pm$ 158.8                       | .969 |
| VAT area (cm <sup>2</sup> )                 | 153.3 $\pm$ 77.4                                  | 151.5 $\pm$ 75.6                        | .822 |
| SAT area (cm <sup>2</sup> )                 | 212.7 $\pm$ 96.1                                  | 213.8 $\pm$ 124.0                       | .927 |
| VAT/SAT ratio                               | 0.83 $\pm$ 0.57                                   | 0.80 $\pm$ 0.45                         | .541 |
| CAC score                                   | 160.5 $\pm$ 354.1                                 | 192.7 $\pm$ 527.7                       | .544 |
| CAD, n (%)                                  | 180 (29.7)                                        | 28 (26.2)                               | .458 |

The independent t-test was used for continuous variables and chi-square for categorical data.

BMI, body mass index; CAC, coronary artery calcium score; CAD, coronary artery disease; DM2, type 2 diabetes mellitus; SAT, subcutaneous adipose tissue; VAT, visceral adipose tissue.
